**Ayurvedic *Amalaki Rasayana* promotes improved stress tolerance and thus has anti-aging effects in *Drosophila melanogaster***

**Vibha Dwivedi<sup>1</sup> and Subhash C. Lakhotia<sup>\*</sup>**

Cytogenetics Laboratory, Department of Zoology, Banaras Hindu University,  
Varanasi 221005, India

<sup>1</sup> Present address: School of Biosciences, University of Birmingham, Birmingham,  
UK (email: vibhasplash@gmail.com)

\* Corresponding author

Email: lakhotia@bhu.ac.in

Tele: +91-542-2368145

ORCID Id: 0000-0003-1842-8411

**Running Title:** *Amalaki Rasayana* betters stress tolerance in *Drosophila*

**Keywords:** Cell Stress Response, Hsp83, Hsp70, Hsp27, Life span, Aging, Ayurveda

## Abstract

### Ethnopharmacological relevance

*Amalaki Rasayana* (AR), a common Ayurvedic herbal formulation of *Phyllanthus emblica* fruits and other ingredients and used for general good health and healthy aging, was reported earlier to improve life history traits and suppress neurodegeneration and induced apoptosis in *Drosophila*.

### Aim of the study

To examine effects of dietary AR supplement on cell stress responses in *Drosophila melanogaster*.

### Materials and methods

Healthy larvae/flies, reared on normal food or on that supplemented with 0.5% (w/v) AR, were exposed to crowding, thermal or oxidative stress and examined for survival, stress tolerance and levels of lipid peroxides, SOD and HSPs.

### Results

Wild type larvae/flies reared on AR supplemented food survived the various cell stresses much better than those reared on normal food. AR-fed mutant *park*<sup>13</sup> or *DJ-1* <sup>$\beta$ Delta93</sup> larvae, however, showed only partial or no protection, respectively, against paraquat-induced oxidative stress. AR feeding reduced the accumulation of reactive oxygen species (ROS) and lipid peroxidation in 35 day old wild type flies while enhancing superoxide dismutase (SOD) activity. Interestingly, while Hsp70 or Hsp83 expression under normal or stress conditions was not differentially affected by AR feeding, levels of Hsp27 were elevated in AR fed wild type control as well as heat shocked larvae. Therefore, besides the known anti-oxidant activity of *Phyllanthus emblica* fruits, dietary AR also enhanced cellular levels of Hsp27.

### Conclusion

AR feeding provides better cell stress tolerance through multiple pathways. Taken in conjunction with our earlier findings, AR promotes "healthy aging" and enhanced life span through better homeostasis and stress tolerance.

## Graphic Abstract

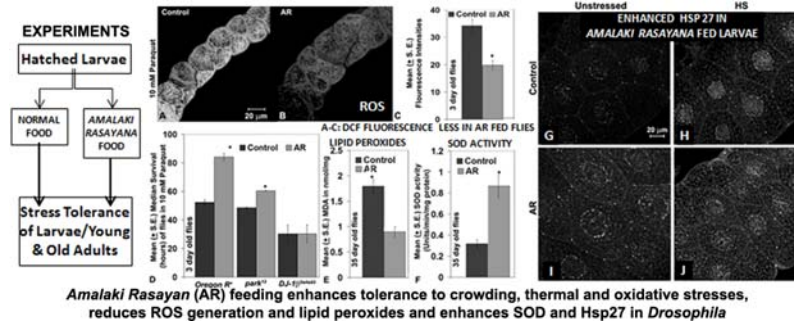

# 1. Introduction

The ancient Ayurvedic literature as available today does not elaborate bases and mechanisms of actions of Ayurveda's varied therapeutic preparations and procedures in terms of our contemporary understanding of biology and other sciences. Therefore, a new class of studies was initiated to rigorously apply the methods of modern science to understand its major concepts, procedures and mechanistic aspects (Valiathan, 2006). With a view to get insight into the cell biological and biochemical bases of actions of one of the classical *Rasayana* formulation viz. *Amalaki Rasayana*, we have used the fruit fly, *Drosophila melanogaster*, as a model organism. *Amalaki Rasayana* (AR) is a prominent herbal formulation in Ayurvedic classics like *Charak Samhita* (Sharma, 1994) and *Ashtang Hridaya* (Murthy, 2000). This *Rasayana* formulation is prepared from fruits of Amla or Indian gooseberry (*Phyllanthus emblica*, synonym *Emblica officinalis*) with some other ingredients following a specific and elaborate process (see Dwivedi et al. 2012). This formulation continues to be widely used in view of the claim that it enhances life expectancy, body strength, intellect, fertility and reduces age-related debilities (Puri, 2003).

We reported earlier (Dwivedi et al. 2012) that rearing of wild type *Drosophila melanogaster* from the beginning of 1<sup>st</sup> instar larval stage on food supplemented with 0.5% AR improved various biological parameters like life-span, fecundity, stress-tolerance etc., which generally agreed with AR's suggested therapeutic applications in Ayurveda. An interesting finding was that AR significantly increased levels of several heterogeneous nuclear ribonucleoproteins (hnRNPs) and P300 (CBP), a histone-acetyl-transferase, in different cell types in the fly model. We also reported that dietary supplement of AR suppressed neurodegeneration in fly models of polyQ-disorders or Alzheimer's disease (AD) without any side-effects (Dwivedi et al. 2013). Dietary supplement of AR not only reduced the polyQ or the A $\beta$  inclusion bodies, it also improved the ubiquitin proteasomal system for better protein clearance in affected cells. Additionally, we also found that AR supplement substantially inhibited induced but not developmental apoptosis (Dwivedi et al. 2015).

Biological systems are fine-tuned to the specific environmental conditions in which they live. However, the dynamicity of external as well as internal environmental conditions continuously challenges the homeostasis of cells and the organism. In

order to meet these continuing insults, biological systems have evolved a variety of highly conserved stress responses which attempt to restore homeostasis or induce cell death to minimize damage to the organism (Arya et al. 2007; Ekengren et al. 2001; Evgen'ev et al. 2014; Feder and Hoffmann, 1999). It is commonly realized that one of the factors that brings about aging and age-related debility is the progressively declining ability to effectively respond to the variety of cell stresses that are experienced by the organism as part of its normal life (Arya et al. 2007; Haigis and Yanker, 2015; Phillips et al. 1989; Wang et al. 2013; Yan, 2014; Zhang et al. 2015).

In this study we have examined if rearing of wild type flies on AR supplemented food affects their tolerance to applied stressors like crowding, severe hyperthermia and increased reactive oxygen species (ROS) production. Growth under crowded conditions limits the resources due to decreased availability of food and consequent increases metabolic waste levels which have detrimental effects on survival of the organism (Borash and Ho, 2001; Mueller and Barter, 2015). Crowding stress resulting from rearing of *Drosophila* larvae at high density causes smaller adult size, reduced fecundity and life span, besides causing increased larval and pupal mortality (Borash and Ho, 2001; Chippindale et al. 1993; Mueller and Barter, 2015). Thermal stress affects many important cellular processes like DNA replication, transcription, post-transcriptional processing, transport and translation in diverse organisms (Arya et al. 2007; Feder and Hoffmann, 1999; Lindquist, 1986). When wild type *Drosophila melanogaster* larvae or flies are exposed under laboratory conditions to temperatures  $>37^{\circ}\text{C}$ , they often get immobilized ("knocked down") and show a high incidence of delayed lethality proportional to the duration and severity of the heat shock, which increases with age due to reduced efficiency of stress response (Calderwood et al. 2009; Landis et al. 2012; Morrow and Tanguay, 2003). The pro-oxidants, generated in course of normal life, in the form of reactive oxygen species (ROS) or free radicals are effectively kept in check by different antioxidant defence systems. However, exposure to adverse physicochemical, environmental or pathological conditions disrupts this delicately maintained balance in favour of pro-oxidants resulting in 'oxidative stresses which can cause extensive cellular damage through DNA damage, modifications of polypeptides, lipids etc (Adelman et al. 1988; Lushchak, 2014; Sies, 2015; Zhao and Haddad, 2011). Depending upon the extent of inflicted damage, different pathological conditions, including cancers and autoimmune diseases ensue.

Pathogenesis of several neurodegenerative diseases, including Parkinson's disease, Alzheimer's disease, Friedreich's ataxia, amyotrophic lateral sclerosis etc. is also known to involve generation of ROS and mitochondrial dysfunction (Gandhi and Abramov, 2012; Greene et al. 2005; Melkani et al. 2013; Shukla et al. 2014). Oxidative damage is considered to be one of the major factors underlying aging process (Landis et al. 2012; Schieber and Chandel, 2014; Wang et al. 2013; Yan, 2014; Zhang et al. 2015)

Our results show that dietary AR significantly improves tolerance of wild type flies to crowding, hyperthermic and paraquat-induced oxidative stress. The AR-fed aged flies show reduced levels of hydroperoxides, and lipid-peroxidation while levels of SOD and Hsp27 are elevated. It appears, therefore, that dietary AR improves fly's tolerance to diverse stresses through multiple paths, the improved stress tolerance in turn promotes increase in their longevity and fecundity as noted earlier (Dwivedi et al. 2012) and suppresses neurodegeneration in polyQ and Alzheimer's disorders. Since *Drosophila* and vertebrates share a large number of genes, possess similar basic metabolic functions that maintain sugar, lipid and amino acid homeostasis (Baker and Thummel, 2007; Britton et al. 2002; Engelman, 2006; Leopold and Perrimon, 2007; Saltiel and Kahn 2001) and have highly conserved PI3K/Akt/mTOR signalling pathways that play central roles in regulation of oxidative metabolism and aging in both groups (Wang et al. 2012), the present findings in the fly model provide a mechanistic basis for the use of AR in traditional Ayurvedic practices for promoting healthy life and healthy aging.

## Materials and Methods

### 1.1. *Drosophila* stocks and rearing

The *Oregon R*<sup>+</sup> strain of *Drosophila melanogaster* was used as wild type. The following two mutant stocks, *w*; +/+; *park*<sup>13</sup>/*Tm6BTb*, and *w*<sup>1118</sup>; +/+; *DJ-1*<sup>*Delta*93</sup> stocks (Bloomington stock no 33601), associated with Parkinson's disease model in flies, were also used. The *park*<sup>13</sup> is a null allele of *parkin* in *Drosophila* (Greene et al. 2005) while *DJ-1* <sup>*Delta*93</sup> is a null allele of *DJ-1* (Meulener et al. 2005). A fly stock (*Hsc70Cb-YFP*, no. 115570 from DGGR, Kyoto) expressing YFP-tagged Hsc70Cb was also used.

All fly stocks were reared on standard agar-cornmeal-sugar-yeast *Drosophila* food at  $24^{\circ}\text{C} \pm 1^{\circ}\text{C}$ . *Amalaki Rasayana*, prepared by Arya Vaidya Sala (Kottakkal, Kerala, India) was mixed in the standard food (0.5% w/v) for rearing of experimental larvae and/or flies at  $24^{\circ}\text{C} \pm 1^{\circ}\text{C}$  as described earlier (Dwivedi et al. 2012), with parallel controls reared on the regular un-supplemented food. In all experiments, eggs were collected from fly stocks that had always been reared on the regular food. For each experiment, the regular (control) and the formulation (AR) supplemented foods were prepared from the same batch and likewise all larvae/adults for a given experiment were derived from a common pool of eggs and reared in parallel on the regular or AR supplemented food.

## 1.2. Crowding resistance assay

Freshly hatched *Oregon R*<sup>+</sup> larvae were reared in standard food vials, each containing about 5g of 0.5% AR supplemented or regular (control) food. 25 (normal density), 50 (moderately crowded) or 100 (highly crowded) freshly emerged larvae were transferred to each food vial and allowed to grow and eclose. The median life span of flies was calculated (Dwivedi et al. 2012) in each case.

## 1.3. Thermal Tolerance Assay

Flies of the desired age (3, 15, 30, 45 or 60 day after eclosion), reared at  $24 \pm 1^{\circ}\text{C}$  either on regular or on 0.5% AR supplemented food through the larval stages were lightly etherised and transferred to plastic vials (25 flies per vial). The flies were allowed to recover from anaesthesia for at least 4 h in food vials before subjecting them to heat shock (HS) in empty vials in a water bath maintained at  $38^{\circ}\text{C}$  for 60 min. The number of flies that could not fly or move and fell down in the vial (knocked down) during the period of HS was monitored every 15 min. After 60 min at  $38^{\circ}\text{C}$ , the flies were transferred to food vials at  $24 \pm 1^{\circ}\text{C}$  and the numbers of flies surviving after 24 h were recorded. Eight replicates of 25 flies each were examined for each experimental condition.

## 1.4. Paraquat induced oxidative stress

Male flies of the *Oregon R*<sup>+</sup> (wild type), *w*; +/+; *park*<sup>13</sup>/*Tm6BTb*, or *w*<sup>1118</sup>; +/+; *DJ-1*<sup>*Delta93*</sup> stocks of desired age, reared either on formulation supplemented or regular food since first instar larval stage, were starved in empty vials for 6 hours before treatment with N, N'-dimethyl -4, 4'-bipyridinium dichloride or paraquat (Sigma-

Aldrich, India). Flies were transferred to a food-free vial containing a filter paper soaked in 10mM paraquat in 5% sucrose solution and kept in a moist chamber (Hao et al. 2007). The flies were monitored for survival at 12 h intervals till all the flies in a vial died. Parallel control flies were kept in vials with filter paper soaked in 5% sucrose solution only. Eight replicates of 25 flies each were examined for each experiment.

### **1.5. Reactive Oxygen Species (ROS) estimation**

To assay cellular ROS levels, the desired tissues of wild type late larvae, 1 or 35 day old wild type flies fed on regular or AR supplemented food since the first instar stage were dissected out in 1X PBS and incubated in 1µg/ml 2',7'-dichlorfluorescein-diacetate (DCFH-DA) at 24<sup>0</sup>C (DCFH-DA, Sigma-Aldrich, India) for 5 min followed by washing twice in 1X PBS and immediately viewed in the LSM 510 Meta Zeiss confocal microscope. Conversion of the non-fluorescent DCFH-DA to highly fluorescent compound 2',7'-dichlorfluorescein (DCF) is directly proportional to levels of hydroperoxides in cells (Cathcart et al. 1983). Therefore, the total fluorescent intensity of DCF indicates the level of ROS in the sample.

### **1.6. Lipid peroxidation measurement**

35 day old 10 male and 10 female wild type flies that were fed on formulation supplemented food or on regular food since the first instar larval stage were homogenized in 150 µl 1X phosphate buffered saline (PBS, 13mM NaCl, 0.7mMNa<sub>2</sub>HPO<sub>4</sub>, 0.3mM NaH<sub>2</sub>PO<sub>4</sub>, pH 7.0) at 4<sup>0</sup>C. Lipid peroxidation was measured following the method of Ohkawa et al. (1979) and levels of lipid peroxides were expressed in terms of nmoles of malondialdehyde (MDA) formed/hour/mg of protein.

### **1.7. Superoxide dismutase Assay**

35 day old 10 males and 10 wild type females, fed on formulation supplemented or regular food since first instar stage, were homogenized in 150 µl extraction buffer (100 mM potassium phosphate and 100 mM EDTA, pH 7.5) at 4<sup>0</sup>C. The Cu–Zn SOD activity was estimated following Kakkar et al. (1984) and expressed as specific activity (enzyme units/min/mg protein)

### **1.8. Immunblotting and immunostaining of tissues**



Western blots of total larval proteins from larvae fed on regular food or AR supplemented food, and subjected to desired experimental condition, were challenged with rat anti-Hsp70 (7Fb, 1:1000 dilution, Velazquez and Lindquist, 1984) or rat anti-Hsc/Hsp70 (7.10.3, 1:500 dilution, Palter et al. 1986) or anti- $\beta$ -tubulin (E7, 1:200 dilution, Sigma Aldrich, India). The primary antibody binding was detected using alkaline phosphatase conjugated anti-rat or anti-mouse IgG (Bangalore Genei, India) secondary antibody, respectively as described earlier (Prasanth et al. 2000). For immunostaining, the desired tissues were dissected out in Poels' salt solution (PSS) (Lakhotia and Tapadia, 1998) and transferred to freshly prepared 3.7% paraformaldehyde for 20 min at RT and processed further for immunostaining as described (Prasanth et al. 2000). The different primary antibodies used were: (1) rat anti-Hsp70 (7Fb, 1:100 dilution), (2) mouse monoclonal anti-Hsp27 (ab49919, 1:100 dilution, Abcam, UK), (3) mouse monoclonal anti-Hsp90 (SPA 830, 1:100 dilution, Stressgen, USA). Appropriate secondary antibodies conjugated either with Cy3 (1:200, Sigma-Aldrich) or Alexa Fluor 488 (1:200, Molecular Probes) were used to detect the given primary antibody. The immunostained tissues were counterstained with DAPI, mounted in DABCO and examined under LSM510 Meta Zeiss laser scanning confocal microscope using appropriate laser, dichroic and barrier filters. Quantitative analysis and colocalization of immuno-fluorescence were carried out using the Histo and Profile tools in the LSM510 Meta software.

All images were assembled using Adobe Photoshop 7.0.

### **1.9. RNA isolation and Real Time-PCR**

Third instar larvae reared either on regular food or on AR supplemented food were dissected out after heat shock/recovery in PSS and total RNA was isolated using the TRI Reagent as per the manufacturer's (Sigma-Aldrich, India) instructions. RNA pellets were resuspended in nuclease free water. The cDNA was synthesized and real-time quantitative PCR (RT-qPCR) was carried out as described previously (Singh and Lakhotia, 2016), using appropriate primers and SYBR-Green dye on 7500 Real Time PCR System (Applied Biosystems) with the 7500 software v2.0.4. The primers used were: (i) G3PDH: Forward: 5'-CCACTGCCGAGGAGGTCAACTA-3', Reverse: 5'-GCTCAGGGTGATTGCGTATGCA-3', (ii) Hsp70: Forward: 5'-AGGGTCAGATCCACGACATC-3', Reverse: 5'-CGTCTGGGTTGATGGATAGG-3', (iii) Hsp27: Forward: 5'-GTCCATGCCACGATCTGTT-3', Reverse: 5'-

CGACACATCCATGCACACCT-3', (iv) Hsp83 Forward: 5'-CCTGGACAAGATCCGCTATG-3', Reverse: 5'-GAAACCCACACCGAACTGAC-3'.

## 1.10. Statistical Analysis

Sigma Plot 11.0 was used for statistical analyses. All percentage data were subjected to arcsine square root transformation. One-Way ANOVA was performed for comparison between the parallel control and formulation fed samples. Data are expressed as mean  $\pm$  S.E. of mean (SEM) of several replicates.

## 2. Results

### 2.1. AR feeding improved median survival of wild type flies maintained under crowded conditions

In order to examine effect of crowding stress on median life span, 50 or 100 larvae and flies were maintained per vial and the proportion of flies that survived on different day were compared with those maintained under uncrowded condition of 25 of larvae/flies per vial. In agreement with earlier observations (Dwivedi et al. 2012), under uncrowded condition, AR feeding increased the median life span of flies when compared with those reared on normal food (**Table 1**). Crowding stress inflicted by keeping 50 or 100 larvae/flies per vial reduced the median life span of flies reared on regular as well as AR supplemented food (**Table 1**). Interestingly, however, the median life span of AR fed flies continued to be significantly greater than of those reared on normal food (**Table 1**). Further, while maximum crowding (100 flies/food vial) on normal food reduced the median life span by about 20% of the uncrowded condition, for the AR-fed flies the reduction was only about 9% of the uncrowded condition.

**Table 1.** Flies reared on AR supplemented food show better tolerance to crowding stress

| No. of flies per vial | Mean ( $\pm$ S.E.) Median life span of flies (in days) reared on different foods |                 |
|-----------------------|----------------------------------------------------------------------------------|-----------------|
|                       | Control                                                                          | AR supplemented |
| <b>25</b>             | 35.4 $\pm$ 1.1                                                                   | 41.2 $\pm$ 1.5* |
| <b>50</b>             | 33.6 $\pm$ 1.8                                                                   | 39.8 $\pm$ 1.4* |
| <b>100</b>            | 28.2 $\pm$ 1.3                                                                   | 37.6 $\pm$ 1.9* |

\* Values significantly different ( $P < 0.001$ ) from the corresponding control values

N= 8 replicates of 25, 50 or 100 flies as per requirement.

## 2.2. AR feeding improved thermo-tolerance in young as well as older flies

It was reported earlier (Dwivedi et al. 2012) that compared to those fed on normal food, the AR fed third instar larvae and 3 day old flies displayed better tolerance to heat shock at 38°C for 60 minutes. In the present study, we examined if older flies also show better thermotolerance when reared on AR supplemented food. Thermotolerance of 3, 15, 30, 45 and 60 day old flies, reared since 1<sup>st</sup> instar larval stage on AR supplemented or normal (control) food was assessed by survivorship after 24 h of the thermal stress and by comparing the proportion of flies knocked down after 15, 30, 45 or 60 min exposure to 38°C. As the data in Table 2 show, the proportion of flies surviving 24 h after the 60 min exposure to 38°C was significantly higher for the AR-fed flies than for those reared on normal food, although as expected, older flies showed greater sensitivity to 60 min exposure to 38°C. Similarly, compared to normal food reared flies, the proportion of flies that were knocked down at different time points of the heat shock was always lower for AR-fed flies, except for the 100% knock down observed in both sets of 45 and 60 day old flies thermally stressed for >30 min. These results thus show that even older flies have better thermo-tolerance when reared on AR supplemented food.

**Table 2.** Feeding on 0.5% AR supplemented food provides high degree of thermo-tolerance to the flies of different age groups

| Age    | Duration (min)<br>at 38°C | Mean ± S.E. % flies<br>Knocked down |              | Mean ± S.E. % flies<br>surviving after 24 h |             |
|--------|---------------------------|-------------------------------------|--------------|---------------------------------------------|-------------|
|        |                           | Control                             | AR           | Control                                     | AR          |
| 3 Day  | 15                        | 0                                   | 0            | 64.5 ± 4.2                                  | 79.5 ± 2.6* |
|        | 30                        | 2 ± 1.1                             | 1.5 ± 1.0    |                                             |             |
|        | 45                        | 61 ± 2.6                            | 32 ± 1.8*    |                                             |             |
|        | 60                        | 83 ± 2.5                            | 60 ± 1.4*    |                                             |             |
| 15 Day | 15                        | 1.5 ± 0.7                           | 1.5 ± 0.5    | 61.5 ± 3.6                                  | 78.5 ± 2.3* |
|        | 30                        | 3.5 ± 1.4                           | 2 ± 1.1      |                                             |             |
|        | 45                        | 65 ± 2.5                            | 28.5 ± 2.3*  |                                             |             |
|        | 60                        | 84.5 ± 2.6                          | 67 ± 2.1*    |                                             |             |
| 30 Day | 15                        | 50.5 ± 2.4                          | 29.5 ± 2.9*  | 41.5 ± 2.3                                  | 70.5 ± 3.4* |
|        | 30                        | 83.5 ± 3.1                          | 55.5 ± 2.4*  |                                             |             |
|        | 45                        | 98.5 ± 1.1                          | 81.5 ± 2.1 * |                                             |             |
|        | 60                        | 100                                 | 100          |                                             |             |
| 45 Day | 15                        | 93.5 ± 2.0                          | 70.5 ± 2.1*  | 26 ± 2.1                                    | 48.5 ± 2.4* |
|        | 30                        | 100                                 | 91.5 ± 1.8*  |                                             |             |
|        | 45                        | 100                                 | 100          |                                             |             |
|        | 60                        | 100                                 | 100          |                                             |             |
| 60 Day | 15                        | 100                                 | 92.5 ± 1.5*  | 17 ± 1.9                                    | 36.5 ± 2.8* |

|  |           |     |     |  |  |
|--|-----------|-----|-----|--|--|
|  | <b>30</b> | 100 | 100 |  |  |
|  | <b>45</b> | 100 | 100 |  |  |
|  | <b>60</b> | 100 | 100 |  |  |

Mean values are based on 8 replicates of 25 flies of each age

\* indicates values to be significantly different ( $P < 0.001$ ) from the corresponding control values.

### **2.3. AR feeding reduced accumulation of Reactive Oxygen Species (ROS) in MT of 35 day old flies**

It has been reported that ROS level increases as the flies age so that mutants deficient in ROS metabolism display reduced longevity and acute sensitivity to stress (Peng et al. 2014; Weber et al. 2012). Since, AR feeding resulted in increased median life span of wild type flies (Dwivedi et al. 2012), the ROS levels in larvae, young and aged flies reared on normal or AR supplemented food were estimated using the DCF fluorescence as indicator of ROS levels

MT from third instar larvae or 1 day old wild type flies fed on AR (**Figure 1A-F**) supplemented food did not display any significant difference in DCF fluorescence compared to their corresponding controls. Irrespective of the feeding regimen, the DCF fluorescence in larval and 1 day old MT was nearly absent or very low, respectively (**Figure 1A-F**). However, MT from 35 day old flies reared on normal food displayed very high DCF fluorescence (**Figure 1G, I**), indicative of accumulation of high levels of ROS as the flies age. Interestingly, MT from 35 day old flies reared on AR supplemented food since larval life showed significantly reduced DCF fluorescence (**Figure 1H, I**) indicating a reduced accumulation of ROS following dietary AR supplement. Examination of the DCF fluorescence in other tissues of larvae/flies also provided comparable results (not shown).

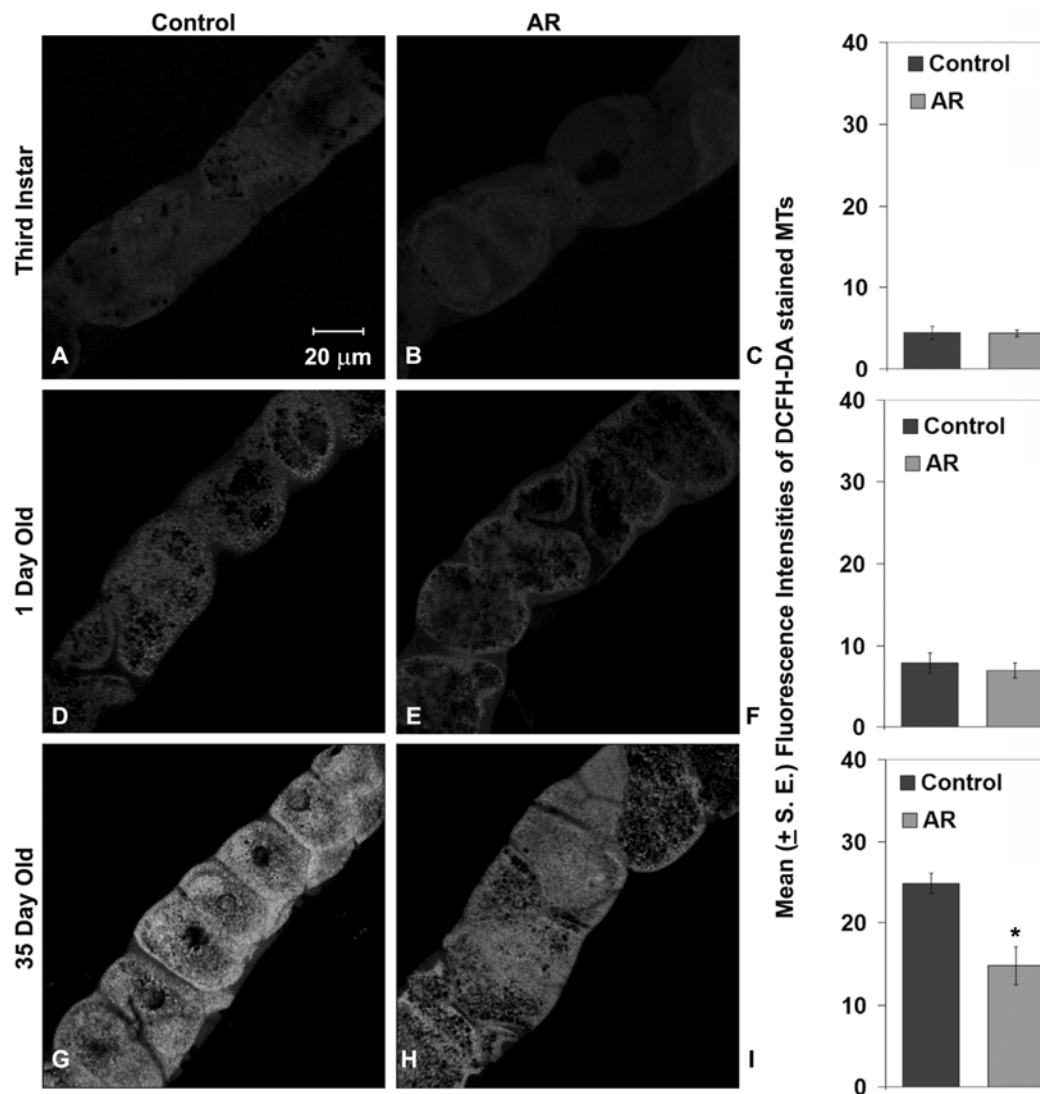

**Figure 1.** AR feeding reduced accumulation of ROS in MT cells in 35 day old flies. Confocal projections of four medial optical sections from MT of third instar larvae (A, B), 1 day old flies (D, E) or 35 day old flies (G, H) reared on normal (A, D and G) or AR (B, E and H) food, show DCF fluorescence following incubation in DCFH-DA. Scale bar in A represents 20μm and applies to all panels. Histograms in C, F and I show mean (±S.E.) intensities of DCF fluorescence (N=25 in each case); \* in I indicates  $P < 0.01$  when compared with the parallel control reared on regular food.

#### 2.4. AR feeding provided better resistance to reactive oxygen species generated by paraquat in wild type flies

The N, N'-dimethyl -4, 4'-bipyridinium dichloride or paraquat is commonly used to generate reactive oxygen species (ROS) in vivo. Three day old wild type male flies,

fed either on regular or AR supplemented food through their larval stages, were starved for six hours at 24<sup>0</sup>C and then transferred to vials without food but with a filter paper soaked in 10mM paraquat in 5% sucrose solution. The ROS accumulation in the flies following paraquat feeding was examined after 24 h using the DCF fluorescence (Cathcart et al. 1983) in Malpighian tubule (MT) cells. Compared to the intensity of DCF fluorescence in Malpighian tubules from paraquat treated flies reared on normal food, the signal was much less in tissues from similarly treated flies that were reared on AR supplemented food (**Figure 2A-C**).

Effect of 10mM paraquat was also examined on survival of flies fed on regular or formulation supplemented food. In agreement with the reduced levels of ROS following paraquat exposure, the AR fed flies exhibited a significantly longer median survival (84.1 h) compared to the 52.4 h median survival of flies grown on regular food (**Figure 2D**). As a negative control, flies reared on normal or AR food showed little death (data not presented) when exposed in parallel to 5% sucrose solution.

## **2.5. AR feeding partially improved survival of *park*<sup>13</sup> mutant flies but not of the *DJ-1* $\beta$ -null flies exposed to paraquat oxidative stress**

Mitochondrial ROS generation is implicated in neurodegenerative diseases like Parkinson's disease (PD, Bonifati et al. 2003; Faust et al. 2009; Joselin et al. 2012; Munoz-Soriano and Paricio, 2011; Narendra et al. 2008, Yang et al. 2005; Yokota et al. 2003). ROS play a key role in the movement of Parkin into mitochondria in neurons (Joselin et al. 2012). A dominant null mutant allele of *parkin* in *Drosophila* is *park*<sup>13</sup> (Greene et al. 2005), has been widely used as a fly model of PD. Another PD associated gene, *DJ-1*  $\beta$ , has a role in protection from oxidative stress (Bonifati et al. 2003; Faust et al. 2009; Meulener et al. 2005; Yang et al. 2005; Yokota et al. 2003). The *park*<sup>13</sup> as well as *DJ-1* $\beta$ <sup>Delta93</sup> individuals are reported to be highly sensitive to oxidative stress (Botella et al. 2009; Meulener et al. 2005). Therefore, *park*<sup>13</sup>/*TM6B* and *DJ-1* $\beta$ <sup>Delta93</sup> larvae were reared on regular or AR supplemented food and the 3 day old male flies were exposed to 10mM paraquat treatment and monitored every 12 hour to count the number of surviving flies. In agreement with earlier studies (Joselin et al. 2012), the *park*<sup>13</sup>/*TM6B* flies reared on regular food were very sensitive to paraquat. AR feeding significantly improved the survival of paraquat treated *park*<sup>13</sup>/*TM6B* flies although the improved median survival was less than that of the AR reared wild type flies exposed to paraquat (**Figure 2D**). Interestingly, however,

AR feeding did not improve the survival of *DJ-1 $\beta$ <sup>Delta93</sup>* (*DJ-1 $\beta$*  null) flies following exposure to paraquat (**Figure 2D**). Formulation fed or regularly fed flies kept in parallel on 5% sucrose solution did not show any significant death during the period of observation (not shown). These results indicate that *DJ-1 $\beta$* , is essential for AR mediated rescue from paraquat-induced oxidative stress.

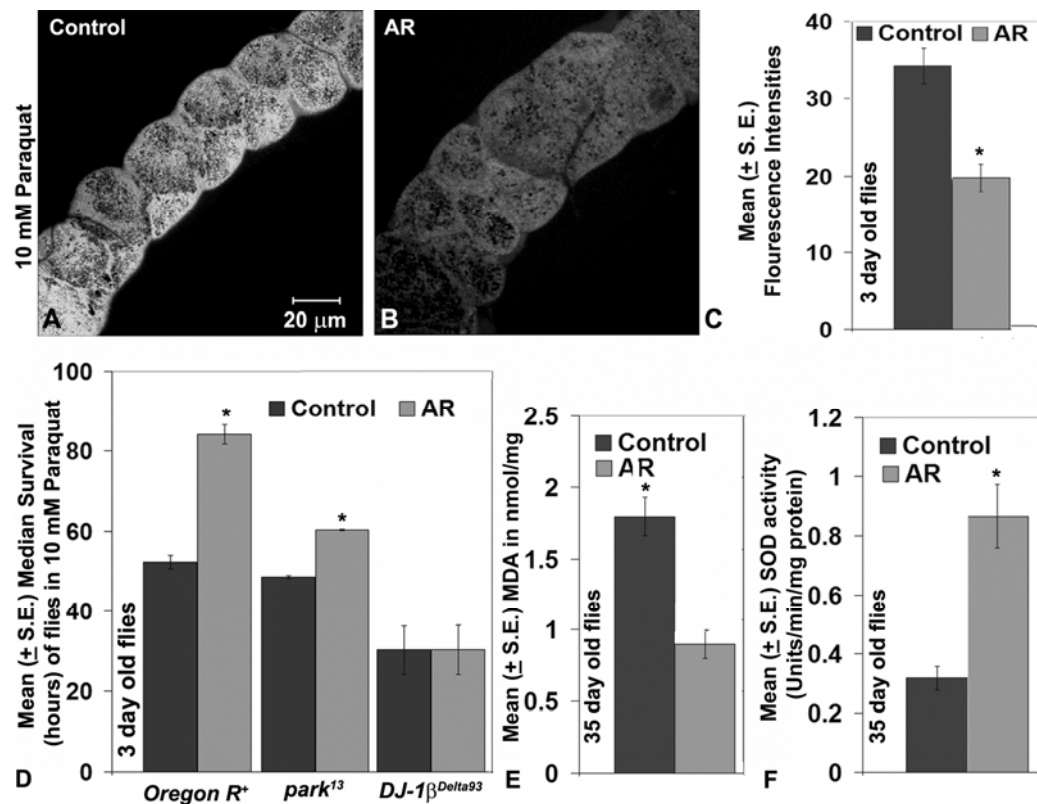

**Figure 2.** AR feeding improved the oxidative stress tolerance in wild type flies. **A** and **B** are confocal projections of four medial optical sections of MT showing DCF fluorescence in 3 day old flies treated for 24 h with 10mM paraquat followed by incubation in DCFH-DA. Scale bar in **A** represents 20μm and applies to images in **A** and **B**. Histogram in **C** shows mean (±S.E., N = 8 for each sample) intensities of DCF fluorescence in MT principle cells. Histogram in **D** shows mean (±S.E.) median survival of WT (*Oregon R<sup>+</sup>*), *park<sup>13</sup>* and *DJ-1 $\beta$ <sup>Delta93</sup>* flies (in hours, Y-axis) kept on 10mM paraquat (N for WT Control=14 replicates, for AR=12 replicates and for *park<sup>13</sup>* and *DJ-1 $\beta$ <sup>Delta93</sup>* Control and AR=8 replicates of 25 male flies each). The bars in histogram shown in **E** represent mean (±S.E.) MDA levels (Y-axis) and those in **F** represent mean (±S.E.) SOD activity (Y-axis) in 35 day old flies fed either on regular food (Control) or AR supplemented (AR) food. \* in **C-F** indicate Mean to be



significantly different ( $P < 0.001$ ) when compared with corresponding Control reared on regular food.

## **2.6. AR feeding decreased lipid peroxidation and increased SOD activity in flies**

Aging is associated with an increase in oxidative damage to nucleic acids, sugars, sterols and lipids (Lushchak, 2014; Peng et al. 2014; Rikans and Hornbrook, 1997; Sies, 2015; Zhao and Haddad, 2011). Since lipid peroxidation is one of the markers for age-associated oxidative damage (Kasapoglu and Ozben, 2001, Peng et al. 2014), we estimated levels of lipid peroxidation in formulation fed and regularly fed 35 day old flies. Lipid peroxide levels were expressed as nano-moles of malondialdehyde (MDA) formed per mg of protein following exposure of the fly homogenates to the assay mixture containing sodium dodecyl sulphate and thiobarbituric acid (Ohkawa et al. 1979). Compared to the regularly fed flies, AR fed 35 day old flies showed significantly less concentration of MDA (**Figure 2E**) reflecting reduced lipid peroxidation.

An inadequate clearance of ROS like superoxide, hydrogen peroxide and the hydroxyl radical results in oxidative damage, leading to physiological dysfunction and many types of age related disorders/diseases (Chaudhari et al. 2007; Park et al. 2005; Tsuzuki et al. 2007; Turner et al. 2009). Glutathione-dependant antioxidants and enzymes like superoxide dismutase (SOD), catalase (CAT) etc. have an evolutionarily conserved role in the metabolism and removal of ROS (Muller et al. 2007). We compared the levels of Cu–Zn SOD activity in 35 day old flies reared on AR supplemented or normal food. Interestingly, AR feeding remarkably enhanced the Cu–Zn SOD activity (**Figure 2F**) in aged flies when compared to those reared in parallel on normal food (**Figure 2F**).

## **2.7. AR feeding did not affect the Hsp70/Hsc70 and Hsp83 gene expression under normal conditions, on heat shock or during recovery**

Since different stress-induced heat shock proteins have been implicated in conferring stress-tolerance and modulating life span (Arya et al. 2007; Feder and Hoffmann, 1999; Lindquist, 1986; Landis et al. 2012; King and MacRae, 2015), we examined levels of Hsp70, Hsp83 and Hsp27 in unstressed and heat shocked tissues of larvae to see if their levels are affected by rearing on AR supplemented food.



Hsp70 is the most strongly induced heat shock protein in *Drosophila* following cell stress (Arya et al. 2007; Feder and Hoffmann, 1999; Guertin et al. 2010; Peterson and Lindquist, 1988), expression pattern and levels of Hsp70 were examined in wild type third instar larval tissues reared on AR or regular food when maintained at 24<sup>0</sup>C or subjected to heat shock at 37<sup>0</sup>C for 1h or allowed to recover from the heat shock for 2 h. Levels of hsp70 transcripts in tissues from AR fed larvae, determined by real time PCR, did not show any significant difference from the corresponding samples of the regular food reared larvae (**Figure 3A**). Third instar larval salivary glands (SG) were immunostained with the stress-induced Hsp70 specific 7Fb antibody (Velazquez and Lindquist, 1984) following heat shock at 37<sup>0</sup>C or after 2h recovery from heat shock. SG from AR or regular food fed larvae showed comparable distribution of Hsp70 (**Figure 3B, B', C, C'**). Unstressed cells from regular or AR fed larvae did not show any detectable levels of Hsp70 (not shown). Western blot detection of Hsp70, using the 7Fb antibody, in whole larval proteins from wild type larvae fed on regular or AR supplemented food and subjected to heat shock at 37<sup>0</sup>C or allowed to recover at 24<sup>0</sup>C from the 1 h heat shock confirmed the above immunostaining results that AR feeding did not alter the levels of induced Hsp70 protein on heat shock or during recovery (inset in **Figure 3B', C'**).

We also examined if the expression of YFP-tagged Hsc70Cb, one of the constitutively expressed Hsc70 family proteins, is affected by AR feeding. The pattern and intensity of YFP fluorescence in SG from late *Hsc70Cb-YFP* larvae fed on regular or AR food did not differ from each other neither under normal conditions nor after heat shock or during recovery from heat shock (**Figure 3D, D', E, E', F, F'**). Western blot detection of all Hsc70/Hsp70, using the 7.10.3 Ab, which detects all constitutive and inducible members of the Hsp70 family in *Drosophila* (Palter et al. 1986), in total proteins from wild type larvae reared either on AR or on regular food confirmed that the levels of Hsc70/Hsp70 remained similar under all conditions (insets in **Figure 3D', E', F'**).

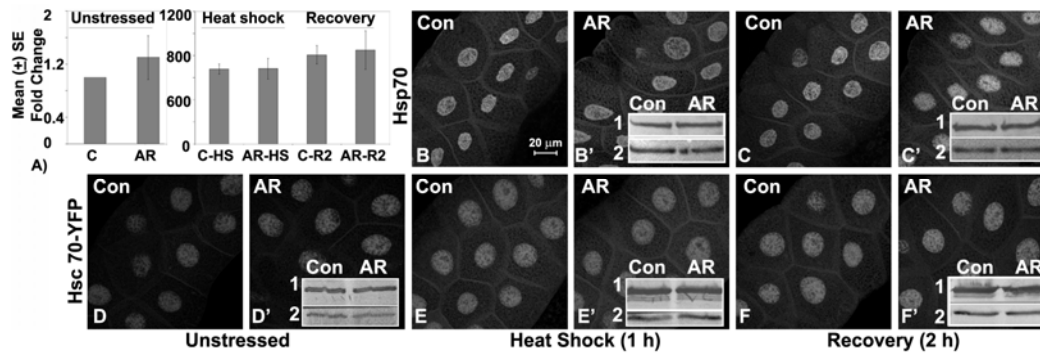

**Figure 3.** Feeding larvae on AR supplemented food did not affect the distribution and levels of Hsp70/Hsc70 on heat shock and during recovery. **A**- Histograms show mean ( $\pm$  S.E.) fold changes of Hsp70 transcripts (Y-axis) in larvae fed on normal (**C**) or AR (**AR**) food at 24°C (unstressed) or following heat shock (**C/AR-HS**) or after 2 h recovery from heat shock (**C/AR-R2**); the Hsp70 mRNA levels in unstressed larvae reared on normal food (**C**) were taken as 1 for estimating the fold changes in other samples. **B-F'**-Confocal projection images showing levels of Hsp70 (**B-C'**) or Hsc70Cb-YFP (**D-F'**) in salivary glands from third instar larvae reared on control (**Con**) or AR supplemented (**AR**) food under different conditions as noted at the bottom (Hsp70 immunostaining for unstressed condition is not shown). The scale bar in **B** (20  $\mu$ m) applies to **B-F'**. Insets in **B'**, **C'** are western blots showing levels of Hsp70 detected by the 7Fb antibody (rows **1**) and those in **D'-F'** show levels of Hsc70/Hsp70 detected by the 7.10.3 antibody (rows **1**) in total proteins from differently fed (**Con** and **AR**) wild type late 3<sup>rd</sup> instar larvae under unstressed (**D'**) or after heat shock (**B'**, **D'**) or after 2 h recovery from heat shock (**C'**, **F'**);  $\beta$ -tubulin levels detected by the E7 antibody, used as the loading control, are shown in lower rows (**2**) in each western blot.

In unstressed cells Hsp83 was abundant in cytoplasm but much less in nuclei of SG from larvae reared on normal or AR supplemented food (**Figure 4A, D**). Following heat shock (**Figure 4B, E**) as well as during recovery from heat shock (**Figure 4C, F**), the Hsp83 was more abundant in SG nuclei than in cytoplasm. However, under all the three conditions, the distribution pattern and levels of Hsp83 in SG polytene cells from AR supplemented food reared larvae were not different from those in normal food reared larvae (**Figure 4**). This was also confirmed by quantification of Hsp83 fluorescence intensity in different samples (**Figure 4G**). Similar results were obtained with MT and eye disc cells (not shown). Levels of hsp83 transcripts in differently fed

larvae were also examined under unstressed conditions, after heat shock and after 2 h recovery by real time PCR. It was observed that levels of *hsp83* transcripts in larvae reared on normal food and AR supplemented food were comparable under various conditions (**Figure 4H**).

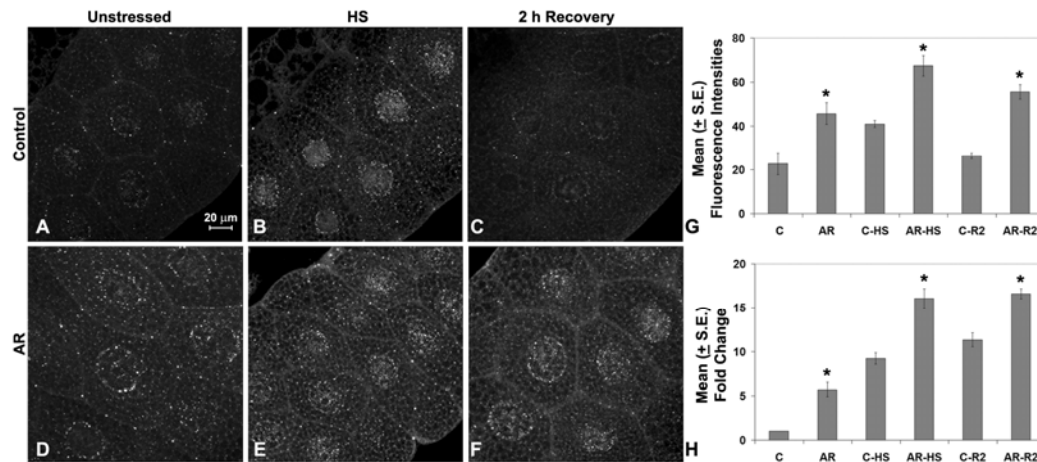

**Figure 4.** Feeding larvae on AR supplemented food did not affect the distribution and levels of Hsp83 protein and transcripts. **A-F** are confocal projections of four medial optical sections of third instar larval salivary glands immunostained with anti-Hsp83 antibody either at 24°C (unstressed, **A**, **D**), or after heat shock at 37°C for 1 hour (**B**, **E**) or after 2 h recovery from heat shock (**C**, **F**). Scale bar in **A** represents 20 μm and applies to images **A-F**. Histogram in **G** shows the mean (± S.E.) fluorescence intensities of Hsp83 in SG of third instar larvae reared on normal (Control) or AR supplemented (AR) food and subjected to various conditions. **H**- Histogram represents mean (± S.E.) fold change of Hsp83 transcripts in larvae fed on AR or normal food either kept under normal condition or heat shocked (HS) or recovered for 2 hours (R2).

The Hsp27 protein is normally distributed in nuclei as well as in cytoplasm of wild type SG from larvae reared on regular food (**Figure 5A**). Following heat shock, Hsp27 levels are enhanced in both nucleus as well as cytoplasm (**Figure 5B**), which nearly restored to that in unstressed cells after 2 h recovery from heat shock (**Figure 5C**). Interestingly, SG cells from AR fed larvae showed significantly higher levels of Hsp27 in nucleus as well as cytoplasm of unstressed cells than in those from regular food reared larvae (compare **Figure 5A** and **D**). Heat shock further elevated levels of Hsp27 in AR fed larval SG (**Figure 5E**). Unlike in regular fed larval SG cells, Hsp27 levels in AR larval SG remained higher even after 2 hour recovery from heat shock

(**Figure 5C and F**). The above noted differences in levels of Hsp27 between normal and AR supplemented food confirmed by quantification of the fluorescence intensity of immunostained cells (**Figure 5G**). Other tissues like MT, eye and other imaginal discs also displayed a comparable difference in the levels of Hsp27 in regularly fed or AR fed larvae (not shown). Examination of levels of *hsp27* transcripts by real time PCR showed that in parallel with the immunostaining patterns, *hsp27* transcripts were significantly more abundant under all conditions (unstressed, heat shock and 2 h recovery) in AR fed larvae than in those reared on regular food. Heat shock resulted in greater induction of *hsp27* transcripts in AR while after 2 hour recovery, the *hsp27* transcripts in AR fed samples still remained higher than that in normal fed recovery sample (**Figure 5H**).

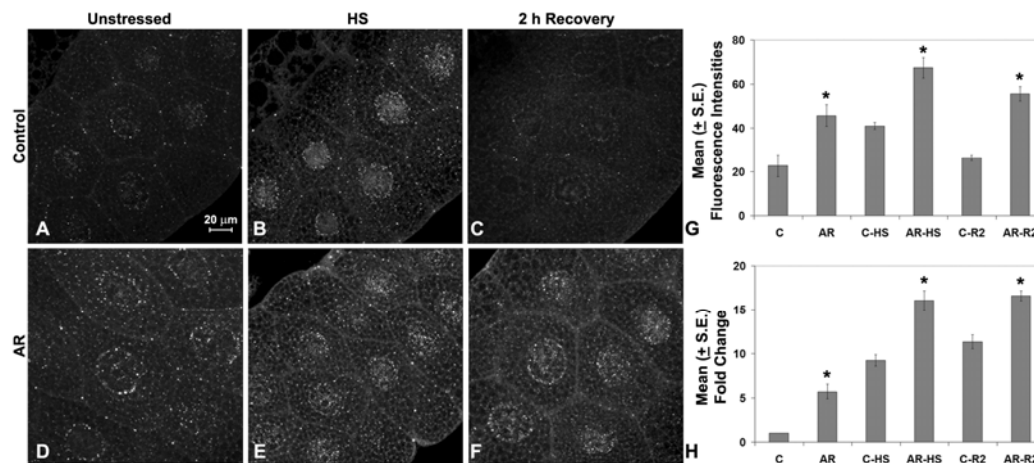

**Figure 5.** Feeding larvae on AR supplemented food elevated the levels of Hsp27 protein and transcripts. **A-F** are confocal projections of four medial optical sections of third instar larval salivary glands immunostained with anti-Hsp27 maintained at 24°C (unstressed, **A, D**), or after heat shock at 37°C for 1 h (**B, E**) or after 2 h recovery from heat shock (**C, F**). Scale bar in **A** represents 20μm and applies to images **A-F**. Histogram in **G** shows the mean (± S.E.) fluorescence intensities of Hsp27 (Y-axis) in SG of third instar larvae reared on regular (C) or AR supplemented (AR) food subjected to various conditions (X-axis). **H**- Histogram represents mean (± S.E.) fold change in levels of Hsp27 transcripts in larvae fed on regular (C) or AR supplemented (AR) food (X-axis). In **G** and **H**, **C** and **AR** indicate unstressed larvae reared on regular or AR supplemented food, **HS** indicate heat shocked samples while **R2** indicates samples recovered for 2 h from the heat shock. \* indicates P<0.001 when compared with the corresponding control (**AR** vs **C**).

### 3. Discussion

Ayurvedic system, the oldest among various traditional health care practices in world, is claimed to provide a holistic health care (Patwardhan et al., 2015; Singh, 2009). Ayurveda has its own wide range of formulations consisting of herbal, mineral and other biological materials, which have been compiled as '*Dravyaguna Sangraha*' (Sharma, 1994; Singh, 2009). However, we know very little about the specific modes of actions of the various complex Ayurvedic formulations (Valiathan, 2006, Lakhotia, 2013). Natural products present in Ayurvedic formulations have provided interesting sources of new molecular entities with potential therapeutic applications; this has stimulated a large number of studies on various herbs to identify the 'active principles'. However, Ayurvedic herbal and other *Rasayanas* are complex mixtures of multiple ingredients which work in a synergistic manner and, therefore, the reductionist approach to identify the 'active principle' does not always provide information on the mechanisms through which the classical formulations exert their effects (Lakhotia, 2013; Patwardhan et al., 2015).

Earlier studies from our laboratory (Dwivedi et al. 2012, 2013, 2015) established *Drosophila* as a model organism to understand the mechanisms and modes of actions of the complex Ayurvedic formulations. As noted earlier, one of the major usages of AR in humans is to rejuvenate and thus improve longevity and maintain youthfulness. Earlier studies showed that feeding flies on 0.5% AR supplemented food enhanced their life span, improved fecundity and enhanced cellular levels of key regulatory molecules like the hnRNPs, CBP300 (Dwivedi et al. 2012), suppressed neurodegeneration associated with polyQ disorders and Alzheimer's Disease (Dwivedi et al. 2013), and prevented induced apoptosis without affecting developmental cell death (Dwivedi et al. 2015). A study in mouse model has shown that the genomic integrity in aging mice provided with AR is significantly better than in control sibs (Swain et al. 2012). Present studies provide further insights into the reported beneficial and rejuvenation affects of dietary AR.

Besides the earlier reported improved tolerance of AR-fed flies to starvation and thermal stress (Dwivedi et al. 2012), present studies clearly show that AR feeding significantly improves tolerance to crowding and oxidative stresses. A more significant finding is that AR-feeding makes even older wild type flies more tolerant to a severe heat shock (38°C). Such improved capability to face various external

environmental stresses as well as internal metabolic oxidative stresses seem to promote the longer life span displayed by the AR fed flies. The improved starvation-tolerance (Dwivedi et al. 2012) and resistance to crowding displayed by AR-fed larvae/flies and their increased longevity agrees with the earlier reported correlation that better larval physiology promotes better starvation tolerance and longevity of adults (Chippindale et al. 1996; Mueller and Barter, 2015; Prasad and Joshi, 2003; Service 1987).

Several studies have reported very strong anti-oxidant activity of extracts of Amla or Indian Gooseberry fruit, the principal component of AR (Chatterjee et al. 2011; Govindarajan et al. 2004; Khan, 2009; Krishnaveni and Mirunalini, 2010; Poltanov et al. 2009; Scartezzini and Speroni, 2000). In agreement, present results show that AR feeding significantly improved the oxidative stress tolerance of wild type flies and remarkably reduced the accumulation of ROS with age, reflecting an improved cellular redox homeostasis. The partially improved survival of *park*<sup>13</sup> flies but no improvement in survival of paraquat exposed *DJ-1β* mutant flies shows that the improved management of ROS by AR feeding requires functional Parkin and more so the DJ-1β protein. The DJ-1β protein plays a significant role in managing oxidative stress and the Phosphatidylinositol 3-Kinase/Akt signalling pathway (Meulener et al. 2005; Yang et al. 2005).

Aging is strongly correlated with sensitivity to components that increase the oxidative stress and thus cause greater damage to macromolecules like DNA and lipids (Haigis and Yanker, 2015; Holmbeck et al. 2014; Lagouge et al. 2013; Mallikarjun et al. 2014; Weber et al. 2012). AR fed flies had reduced levels of ROS and reduced levels of lipid peroxidation. Populations of flies with longer life span exhibit higher frequencies of the high-activity allele of the Cu–Zn SOD which has an important role in conferring resistance to oxidative stressors through removal of superoxides (Peng et al. 2014; Tyler et al. 1993). The significantly improved SOD activity in AR fed older flies contributes to reduced oxidative damage, which in turn would improve fecundity and life span. The increased resistance to oxidative stress following AR feeding appears to also underlie the reported reduced DNA damage seen in aged mice (Swain et al., 2012).

The significantly greater thermotolerance exhibited by older flies that were reared on AR supplemented food is remarkable. Our results show that unlike the generally



strong correlation (Krebs and Feder, 1998; Lin et al. 2014; Stetina et al. 2014) between thermotolerance and expression of heat shock proteins, especially the Hsp70, AR did not significantly affect expression of Hsp83 and Hsp70 proteins or transcripts. On the other hand we found that basal as well as heat shock induced levels of Hsp27 were significantly more elevated in AR fed larvae. It is interesting that although Hsp27 is reported to be unessential for surviving heat shock (Hao et al., 2007), it plays significant roles in tolerance to other insults like starvation, oxidative stress etc and also in determining the life span of flies (Hao et al. 2007, Pandey et al. 2015; Shi et al. 2011; Wang et al. 2004). Thus the improved thermo-tolerance of AR fed larvae and flies does not appear to be due to their stronger heat shock response. It may be noted that the heat shock response is a transient process and its long-term activation may actually be harmful (Lamech and Haybes, 2014). The improved thermo-tolerance that follows rearing on AR supplemented food may thus be due to better management of oxidative stress as also to the overall improved physiology and homeostasis (Dwivedi et al., 2012, 2013, 2015) promoted by AR through enhanced levels of key regulatory molecules like different hnRNPs and CBP300 (histoneacetyl transferase) and proteasomal activity that have global roles in maintaining gene expression. Various environmental insults (external as well as internal) also induce cells to apoptotic pathways, which is one of the factors underlying aging (Lu et al. 2012; Pérez-Garijo and Steller, 2015). Our earlier finding that AR feeding suppresses induced but not the developmental apoptosis also indicates a better cellular tolerance promoted by AR to environmental insults (Dwivedi et al. 2015).

#### **4. Conclusions**

The modern medicine and Ayurveda, although have universal attributes and share the common objective of well being of mankind, seem to differ in their philosophical and epistemological foundations, conceptual framework and practical outlook (Patwardhan et al. 2015). Most contemporary scientific studies to understand specific Ayurvedic formulations/therapies employ the typical reductionist approach of molecular biology to identify the so called “active principle”. However, this is not in consonance with the holistic and combinatorial approach of Ayurveda (Lakhotia, 2013; Patwardhan et al. 2015). Therefore, unbiased and a rational understanding of Ayurvedic Biology in a holistic manner is expected to provide better quality control of the various formulations. Our findings in the fly model have clinical implications

since the more robust physiological state following dietary AR supplement in flies suggest that AR may prevent several diseases and aging conditions and thus contribute to "healthy aging" in mankind.

## 5. Acknowledgements

We thank Arya Vaidya Sala, Kottakal (Kerala, India) for providing the *Amalaki Rasayana* formulation and Prof. M. S. Valiathan for initiating the coordinated studies on Science of Ayurveda. We thank Dr. P. K. Tiwari (Gwalior, India) for providing the anti-Hsp27, Dr. R. M. Tanguay (Canada) for anti-Hsp90 antibody and Dr. M. B. Evgen'ev (Russia) for 7Fb and 7.10.3 antibodies. Bloomington stock centre is acknowledged for providing various stocks used in present study. This work was supported in part by a grant (no. Prn.SA/ADV/Ayurveda/6/2006) from the Office of the Principal Scientific Advisor to Govt. of India (New Delhi) and by the Raja Ramanna Fellowship of the Department of Atomic Energy (Govt. of India, Mumbai) to SCL. The Confocal Facility, established by the Department of Science & Technology, Govt. of India (New Delhi), is supported by the Banaras Hindu University. VD is supported by research fellowship from University Grants Commission (New Delhi).



## 6. References

- Adelman, R., Saul, R.L., Ames, B.N. 1988. Genetics oxidative damage to DNA: relation to species metabolic rate and life span. *Proc. Nail. Acad. Sci. USA.* 85. 2706-2708.
- Arya, R., Mallik, M., Lakhota S.C., 2007. Heat shock genes – integrating cell survival and death. *J. Biosci.* 32, 494–610.
- Baker, K.D., Thummel, C.S., 2007. Diabetic larvae and obese flies-emerging studies of metabolism in *Drosophila*. *Cell Metab.* 6, 247-266.
- Bonifati, V., Rizzu, P., Squitieri, F., Krieger, E., Vanacore, N, et al, 2003. DJ-1 (PARK7), a novel gene for autosomal recessive, early onset parkinsonism. *Neurol. Sci.* 24, 149-160.
- Borash D.J., Ho G.T., 2001. Patterns of selection: stress resistance and energy storage in density-dependent populations of *Drosophila melanogaster*. *J. Insect Physiol.* 47, 1349–1356
- Britton, J.S., Lockwood, W.K., Li, L., Cohen, S.M., Edgar, B.A., 2002. *Drosophila*'s insulin/PI3-kinase pathway coordinates cellular metabolism with nutritional conditions. *Dev. Cell.* 2, 239-249.
- Calderwood, S.K., Murshid, A., Prince, T., 2009. The shock of aging: molecular chaperones and the heat shock response in longevity and aging – a mini-review. *Gerontology.* 44, 440–448.
- Cathcart, R., Schwieters, E. Ames, B.N., 1983. Detection of picomole levels of hydroperoxides using a fluorescent dichlorofluorescein assay. *Anal. Biochem.* 134, 111-116.
- Chatterjee, U.R., Bandyopadhyay, S.S., Ghosh, D., Ghosal, P.K., Ray, B., 2011. In vitro anti-oxidant activity, fluorescence quenching study and structural features of carbohydrate polymers from *Phyllanthus emblica*. *Int. J. Biol. Macromol.* 49, 637-642.
- Chaudhari, A.A., Seol, J.W., Kim, S.J., Lee, Y.J., Kang, H.S., et al., 2007. Reactive oxygen species regulate Bax translocation and mitochondrial transmembrane potential, a possible mechanism for enhanced TRAIL-induced apoptosis by CCCP. *Oncol. Rep.* 18, 71-76.
- Chippindale, A.K., Chu, T.J.F., Rose, M.R., 1996. Complex trade-offs and the evolution of starvation resistance in *Drosophila melanogaster*. *Evolution* 40, 743–766.
- Dwivedi, V., Anandan, E.M., Mony, R.S., Muraleedharan, T.S., Valiathan, M.S., Mutsuddi, M., Lakhota, S.C., 2012. In vivo effects of traditional Ayurvedic formulations in *Drosophila melanogaster* model relate with therapeutic applications. *PLoS One.* 7, e37113.
- Dwivedi, V., Tiwary, S., Lakhota, S.C., 2014. Suppression of induced but not developmental apoptosis by Ayurvedic, Amalaki Rasayana and Rasa-Sindoor in *Drosophila melanogaster*. *J. Biosci.* 40, 281-297.

- Dwivedi, V., Tripathi, B.K., Mutsuddi, M., Lakhotia, S.C., 2013. Ayurvedic Amalaki Rasayana and Rasa-Sindoor suppress neurodegeneration in fly models of Huntington's and Alzheimer's diseases. *Curr. Sci.* 104, 1711-1723.
- Ekengren, S., Tryselius, Y., Dushay, M.S., Liu, G., Steiner, H., Hultmark, D., 2001. A humoral stress response in *Drosophila*. *Curr. Biol.* 11, 1479.
- Engelman, J.A., Luo, J., Cantley, L.C., 2006. The evolution of phosphatidylinositol 3-kinases as regulators of growth and metabolism. *Nat. Rev. Genet.* 7, 606-619.
- Evgen'ev, M.B., Garbuz, D.G., Zatssepina, O.G., 2014. Heat shock proteins and whole body adaptation to extreme environments. Springer, Dordrecht Heidelberg New York London.
- Faust, K., Gehrke, S., Yang, Y., Yang, L., Beal, M.F., Lu, B., 2009. Neuroprotective effects of compounds with antioxidant and anti-inflammatory properties in a *Drosophila* model of Parkinson's disease. *BMC Neurosci.* 10, 109, doi:10.1186/1471-2202-10-109.
- Feder, M.E., Hofmann, G.E., 1999. Heat-shock proteins, molecular chaperones, and the stress response, evolutionary and ecological physiology. *Annu. Rev. Physiol.* 61, 243–282.
- Gandhi, S., Abramov, A.Y., 2012. Mechanism of oxidative stress in neurodegeneration. *Oxidative Med. Cell. Longevity.* Article ID 428010, doi:10.1144/2012/428010.
- Govindarajan, R., Vijayakumar, M., Pushpangadan, P., 2004. Antioxidant approach to disease management and the role of 'Rasayana' herbs of Ayurveda. *J. Ethnopharmacol.* 99, 164-178.
- Greene, J.C., Whitworth, A.J., Andrews, L.A., Parker, T.J., Pallanck, L.H., 2005. Genetic and genomic studies of *Drosophila* parkin mutants implicate oxidative stress and innate immune responses in pathogenesis. *Human Mol. Genet.* 14, 799-811.
- Guertin, M.J., Petesch, S.J., Zobeck, K.L., Min, I.M., Lis, J.T., 2010. *Drosophila* heat shock system as a general model to investigate transcriptional regulation. *Cold Spring Harb. Symp. Quant. Biol.* 74, 1-9.
- Haigis, M.C., Yankner, B.A., 2015. The aging stress response. *Mol. Cell.* 40, 333-344.
- Hao, X., Zhang, S., Timakov, B., Zhang, P., 2007. The Hsp27 gene is not required for *Drosophila* development but its activity is associated with starvation resistance. *Cell Stress Chaperones.* 12, 364-372.
- Holmbeck, M.A., Rand, D.M., 2014. Dietary fatty acids and temperature modulate mitochondrial function and longevity in *Drosophila*. *J. Gerontol.* doi: 10.1093/gerona/glv044.
- Joselin, A.P., Hewitt, S.J., Callaghan, S.M., Kim, R.H., Chung, Y.H., Mak, T.W., et al., 2012. ROS-dependent regulation of Parkin and DJ-1 localization during oxidative stress in neurons. *Human Mol. Genet.* 21, 4888–4903.
- Kakkar, P., Das, B., Vishwanathan, P.N., 1984. A modified spectrophotometric assay of superoxide dismutase. *Indian J. Biochem. Biophys.* 21, 130–132.

- Kasapoglu, M., Ozben, T., 2001. Alterations of antioxidant enzymes and oxidative stress markers in aging. *Exp. Gerontol.* 36, 209-220.
- Khan, K.H., 2009. Roles of *Emblica officinalis* in medicine, a review. *Botany Res. Internatl.* 2, 218-228.
- King, A.M., MacRae, T.H., 2015. Insect heat shock proteins during stress and diapause. *Annu. Rev. Entomology.* 60, 49-74. DOI: 10.1146/annurev-ento-011613-162107.
- Krebs, R.A., Feder, M.E., 1998. Hsp70 and larval thermotolerance in *Drosophila melanogaster*: how much is enough and when is more too much? *J. Insect. Physiol.* 44, 1091-1101.
- Krishnaveni, M., Mirunalini, S., 2010. Therapeutic potential of *Phyllanthus emblica* (Amla): the Ayurvedic wonder, *J. Basic Clin. Physiol. Pharmacol.* 21, 93-104.
- Lagouge, M., Larsson, N.G., 2013. The role of mitochondrial DNA mutations and free radicals in disease and ageing. *J. Intern. Med.* 273, 429-443.
- Lakhotia, S.C., 2013. In-depth basic science studies essential for revival of Ayurveda. *Ann. Ayurvedic Med.* 2, 58-60.
- Lakhotia, S.C., Tapadia, M., 1998. Genetic mapping of the amide response element(s) of the hsrw locus of *Drosophila melanogaster*. *Chromosoma.* 107, 127-135.
- Lamech, L.T., Haynes, C.M., 2014. The unpredictability of prolonged activation of stress response pathways. *J. Cell Biology.* 209, 781-787.
- Landis, G., Shen, J., Tower, J., 2012. Gene expression changes in response to aging compared to heat stress, oxidative stress and ionizing radiation in *Drosophila melanogaster*. *Aging.* 4, 768-789.
- Leopold, P., Perrimon, N., 2007. *Drosophila* and the genetics of the internal milieu. *Nature.* 440, 186-188.
- Lin, H.J., Li, Z., Dang, X.Q., Su, W.J., Zhou, Z.Y., Wang, L.L., 2014. Short-term increased expression of the heat shock protein 70 family members during heat shock is positively correlated with basal thermotolerance in the midgut of three strains of the silkworm, *Bombyx mori*. *African Entomology.* 22, 24-29.
- Lindquist, S. 1986. The Heat-Shock Response. *Ann. Rev. Biochem.* 55, 1151-1191.
- Lu, B., Chen, H.D., Lu, H.G., 2012. The relationship between apoptosis and aging. *Adv. Bioscience Biotech.* 3, 705-711, DOI: 10.4236/abb.2012.326091.
- Lushchak, A.I., 2014. Free radicals, reactive oxygen species, oxidative stress and its classification. *Chemico-Biological Interactions.* 224, 164-174.
- Mallikarjun, V., Sriram, A., Scialo, F., Sanz, A., 2014. The interplay between mitochondrial protein and iron homeostasis and its possible role in ageing. *Exp. Gerontol.* 46, 123-134.
- Melkani, G.C., Trujillo, A.S., Ramos, R., Bodmer, R., Bernstein, S.I., et al., 2013. Huntington's disease induced cardiac amyloidosis is reversed by modulating protein folding and oxidative stress pathways in the *Drosophila* heart. *PLoS Genet.* 9, e1004024. doi:10.1371/journal.pgen.1004024

- Meulener, M., Whitworth, A.J., Armstrong-Gold, C.E., Rizzu, P., Heutink, P., et al., 2005. *Drosophila* DJ-1 mutants are selectively sensitive to environmental toxins associated with Parkinson's disease. *Current Biology*. 15, 1572–1577.
- Morrow, G., Tanguay, R.M., 2003. Heat shock proteins and aging in *Drosophila melanogaster*. *Seminars. Cell Develop. Biol.* 14, 291–299.
- Mueller, L.D., Barter, T.T., 2015. A model of the evolution of larval feeding rate in *Drosophila* driven by conflicting energy demands. *Genetica*. 143, 93–100.
- Muller, F.L., Song, W., Jang, Y.C., Liu, Y., Sabia, M., et al., 2007. Denervation-induced skeletal muscle atrophy is associated with increased mitochondrial ROS production. *Am. J. Physiol. Regul. Integr. Comp. Physiol.* 293, 1149–1168.
- Munoz-Soriano, V., Paricio, N., 2011. *Drosophila* models of Parkinson's disease: discovering relevant pathways and novel therapeutic strategies, *Parkinson's Disease*. 2011, Article ID 420640, DOI: 10.4061/2011/420640.
- Murthy, K.R.S., 2000. *Ashtanga Hridaya* (Sanskrit with English Translation), Krishnadas Academy, Varanasi.
- Narendra, D., Tanaka, A., Suen, D.F., Youle, R.J., 2008. Parkin is recruited selectively to impaired mitochondria and promotes their autophagy. *J. Cell Biol.* 183, 794–803.
- Ohkawa, H., Ohishi, N., Yagi, K., 1979. Assay for lipid peroxides in animal tissues by thiobarbituric acid reaction. *Anal. Biochem.* 94 341– 348.
- Palter, K.B., Watanabe, M., Stinson, L., Mahowald, A.P., Craig, E.A., 1986. Expression and localization of *Drosophila melanogaster* Hsp70 cognate proteins. *Mol. Cell Biol.* 6,1187–1203.
- Pandey, A., Sainy, S., Khatoon, R., Sharma, D., Narayan, G., Kar Chowdhuri, D., 2015. Overexpression of *hsp27* rescued neuronal cell death and reduction in life- and health-span in *Drosophila melanogaster* against prolonged exposure to dichlorvos. *Mol. Neurobiol.* DOI: 10.1007/s12035-015-9221-3
- Park, J., Kim, S.Y., Cha, G.-H., Lee, S.B., Kim, S., Chung, J., 2005. *Drosophila* DJ-1 mutants show oxidative stress-sensitive locomotive dysfunction. *Gene*. 361, 133–139.
- Patwardhan, B., Mutalik, G., Tillu, G., 2015. *Integrative Approaches for Health: Biomedical Research, Ayurveda and Yoga*. Elsevier/Academic Press, London.
- Peng, C., Wang, X., Chen, J., Jiao, R., Wang, L., et al., 2014. Biology of ageing and role of dietary antioxidants, *Biomed. Res. Int.* 83, 831841, DOI: 10.1144/2014/831841.
- Pérez-Garijo, A., Steller, H. 2015. Spreading the word: non-autonomous effects of apoptosis during development, regeneration and disease. *Development*. 142, 3253–3262, DOI:10.1242/dev.127878.
- Peterson, R., Lindquist, S., 1988. The *Drosophila* hsp70 message is rapidly degraded at normal temperatures and stabilized by heat shock. *Gene*. 72, 161–168.
- Phillips, J.P., Campbell, S.D., Michaud, D., Charbonneau, M., Hilliker, A.J., 1989. Null mutation of copper/zinc superoxide dismutase in *Drosophila* confers hypersensitivity to paraquat and reduced longevity. *Proc. Natl. Acad. Sci. USA*. 86, 2761–2764.

- Poltanov, E.A., Shikov, A.N., Dorman, H.J., Pozharitskaya, O.N., Makarov, V.G., et al., Chemical and antioxidant evaluation of Indian gooseberry (*Emblica officinalis* Gaertn, syn. *Phyllanthus emblica* L.) supplements, *Phytother Res* 23, 1309-1314, 2009
- Prasad, N.G., Joshi, A., 2003. What have two decades of laboratory life-history evolution studies on *Drosophila melanogaster* taught us? *J. Genet.* 82, 44–76.
- Prasanth, K.V., Rajendra, T.K., Lal, A.K., Lakhotia, S.C., 2000. Omega speckles - a novel class of nuclear speckles containing hnRNPs associated with noncoding hsr-omega RNA in *Drosophila*. *J. Cell Sci.* 113, 3484-3497.
- Puri, H. S., 2003. *Rasayana: ayurvedic herbs for longevity and rejuvenation*. Taylor & Frauds, London, New York.
- Rikans, L.E., Hornbrook, K.R., 1997. Lipid peroxidation, antioxidant protection and aging. *Biochim. Biophys. Acta.* 1362, 116-127.
- Saltiel, A.R., Kahn, C.R., 2001. Insulin signalling and the regulation of glucose and lipid metabolism. *Nature.* 414, 799-806.
- Scartezzini, P., Speroni, E., 2000. Review on some plants of Indian traditional medicine with antioxidant activity. *J. Ethnopharmacol.* 71, 23-43.
- Schieber, M., Chandel, N.S., 2014. ROS function in redox signaling and oxidative stress. *Current Biology.* 24, R443–R462.
- Service, P.M., 1987. Physiological mechanisms of increased stress resistance in *Drosophila melanogaster* selected for postponed senescence. *Physiol. Zool.* 60, 321–326.
- Sharma, P.V., *Charaka Samhita*, (Sanskrit with English Translation), Varanasi, India: Chaukhambha Orientalia, 1994
- Shi, Y., Nishida, K., Giammartino, D.C.D., Manley, J.L., 2011. Heat shock-induced SRSF10 dephosphorylation displays thermotolerance mediated by Hsp27. *Mol. Cell Biol.* 31, 448-464.
- Shukla, A.K., Pragya, P., Chaouhan, H.S., Patel, D.K., Abdin, M.Z., Kar Chowdhuri D., 2014. A mutation in *Drosophila methuselah* resists paraquat induced Parkinson-like phenotypes. *Neurobiol. Aging.* 34, 2419.e1e2419.e16.
- Sies, H., 2015. Oxidative stress: a concept in redox biology and medicine. *Redox Biology.* 4, 180–183.
- Singh, A.K., Lakhotia, S.C., 2016. Expression of *hsrw-RNAi* transgene prior to heat shock specifically compromises accumulation of heat shock induced Hsp70 in *Drosophila melanogaster*. *Cell Stress Chaperones.* 20, 105-121.
- Singh, R.H., 2009. *Body, mind, spirit- Integrative medicine in Ayurveda Nature and Yoga*. Chaukhamba Sanskrit Pratishthan, Varanasi.
- Stetina, T., Kostal, V., Korbelova, J., 2014. The role of inducible Hsp70 and other heat shock proteins, in adaptive complex of cold tolerance of the fruit fly (*Drosophila melanogaster*). *PLoS One.* 10, e0128976.
- Swain, U., Sindhu, K.K., Boda, U., Pothani, S., Giridharan, N.V., Raghunath, M., Rao, K.S., 2012. Studies on the molecular correlates of genomic stability in rat brain cells following Amalakirasayana therapy. *Mech. Ageing Dev.* 133, 112-117.

- Tsuzuki, T., Nakatsu, Y., Nakabeppu, Y., 2007. Significance of error-avoiding mechanisms for oxidative DNA damage in carcinogenesis. *Cancer Sci.* 98, 464-470.
- Turner, E., Brewster, J.A., Simpson, N.A., Walker, J.J., Fisher, J., Imidazole-based erythrocyte markers of oxidative stress in preeclampsia-an NMR investigation, *Reprod Sci* 16, 1040-1041, 2009
- Tyler, R.H., Brar, H., Singh, M., Latorre, A., Graves, J.L., et al., 1993. The effect of superoxide dismutase alleles on aging in *Drosophila*. *Genetica.* 91, 143-149.
- Valiathan, M.S., 2006. Ayurvedic biology: a decadal vision document. Indian Academy of Science, Bangalore.
- Velazquez, J.M., Lindquist, S., 1984. hsp70: nuclear concentration during environmental stress and cytoplasmic storage during recovery. *Cell.* 36, 644-662.
- Wang, C., Liu, Z.,Huang, X., 2012. Rab32 is important for autophagy and lipid storage in *Drosophila*, *PLoS One* 7, e32086.
- Wang, C.H., Wu, S.B., Wu, Y.T., Wei, Y.H., 2013. Oxidative stress response elicited by mitochondrial dysfunction: implication in the pathophysiology of aging. *Experimental Biology Medicine.* 238: 440–460, DOI: 10.1177/1434370213493069.
- Wang, H.D., Kazemi-Esfarjani, P., Benzer, S., 2004. Multiple-stress analysis for isolation of *Drosophila* longevity genes. *Proc. Natl. Acad. Sci. USA.* 101, 12610-12614.
- Weber, A.L., Khan, G.F., Magwire, M.M., Tabor, C.L., Mackay, T.F., Anholt, R.R., 2012. Genome-wide association analysis of oxidative stress resistance in *Drosophila melanogaster*. *PLoS One.* 7, e34744.
- Yan, L.J., 2014. Positive oxidative stress in aging and aging-related disease tolerance. *Redox Biology.* 2, 164–169.
- Yang, Y., Gehrke, S., Haque, M.E., Imai, Y., Kosek, J., Yang, L., et al., 2005. Inactivation of *Drosophila* DJ-1 leads to impairments of oxidative stress response and phosphatidylinositol 3-kinase/akt signaling. *Proc. Natl. Acad. Sci. USA.* 102, 13670-13674.
- Yokota, T., Sugawara, K., Ito, K., Takahashi, R., Ariga, H., Mizusawa. H., 2003. Down regulation of DJ-1 enhances cell death by oxidative stress, ER stress and proteasome inhibition. *Biochem. Biophys. Res. Commun.* 312, 1342-1348.
- Zhang, H., Davies, K.J.A., Forman, H.J., 2015. Oxidative stress response and Nrf2 signaling in aging. *Free Radical Biology Medicine.* 88, 314–336.
- Zhao, H.W., Haddad. G.G., 2011. Review: hypoxic and oxidative stress resistance in *Drosophila melanogaster*. *Placenta.* 32, Supplement B, Trophoblast Research, 24, S104-S108.
